# Supplementary material for: Model structures of molten salt-promoted MgO to probe the mechanism of MgCO3 formation during CO2 capture at a solid–liquid interface
Source: Royal Society of Chemistry journal article supplement (doi:10.1039/d2ta02897b), 2022-01-01
Supplement: d2ta02897b1.pdf [file d2ta02897b1.pdf]

### Supporting Information

Model structures of molten salt-promoted MgO to probe the mechanism of  $\text{MgCO}_3$  formation during  $\text{CO}_2$  capture at a solid-liquid interface.

Alexander. H. Bork<sup>a</sup>, Norbert Ackerl<sup>a</sup>, Joakim Reuteler<sup>b</sup>, Sachin Jog<sup>a</sup>, David Gut<sup>a</sup>, Robert Zboray<sup>c</sup>, Christoph. R. Müller<sup>a,\*</sup>

<sup>a</sup> Laboratory of Energy Science and Engineering, Department of Mechanical and Process Engineering, ETH Zurich, CH-8092 Zürich, Switzerland

<sup>b</sup> Scientific Center for Optical and Electron Microscopy, ETH Zurich, CH-8093 Zurich, Switzerland

<sup>c</sup> Center for X-ray Analytics, Empa, Swiss Federal Laboratories for Materials Science and Technology, CH-8600 Dübendorf, Switzerland

\*Corresponding author: Prof. Christoph R. Müller, email: [muelchri@ethz.ch](mailto:muelchri@ethz.ch).

Keywords:  $\text{CO}_2$  capture, MgO-based sorbents, carbonation mechanism, molten salt - metal oxide interface, nucleation and crystal growth

Table S1. Depth of grooves in the laser ablated samples MgO\_A and MgO\_B determined by SEM using mechanically cleaved cross sections and optical profilometry, respectively. Note optical profilometry was only possible in MgO\_B. In sample MgO\_A the width of all grooves at the top was 100  $\mu\text{m}$  and in MgO\_B 200  $\mu\text{m}$ .

| Groove No. | MgO_A<br>Depth ( $\mu\text{m}$ ) | MgO_B<br>Depth ( $\mu\text{m}$ ) |
|------------|----------------------------------|----------------------------------|
| 1          | 8                                | 6                                |
| 2          | 28                               | 11                               |
| 3          | 61                               | 11                               |
| 4          | 107                              | 22                               |
| 5          | 172                              | 44                               |
| 6          | 238                              | 84                               |
| 7          |                                  | 122                              |
| 8          |                                  | 155                              |
| 9          |                                  | 180                              |

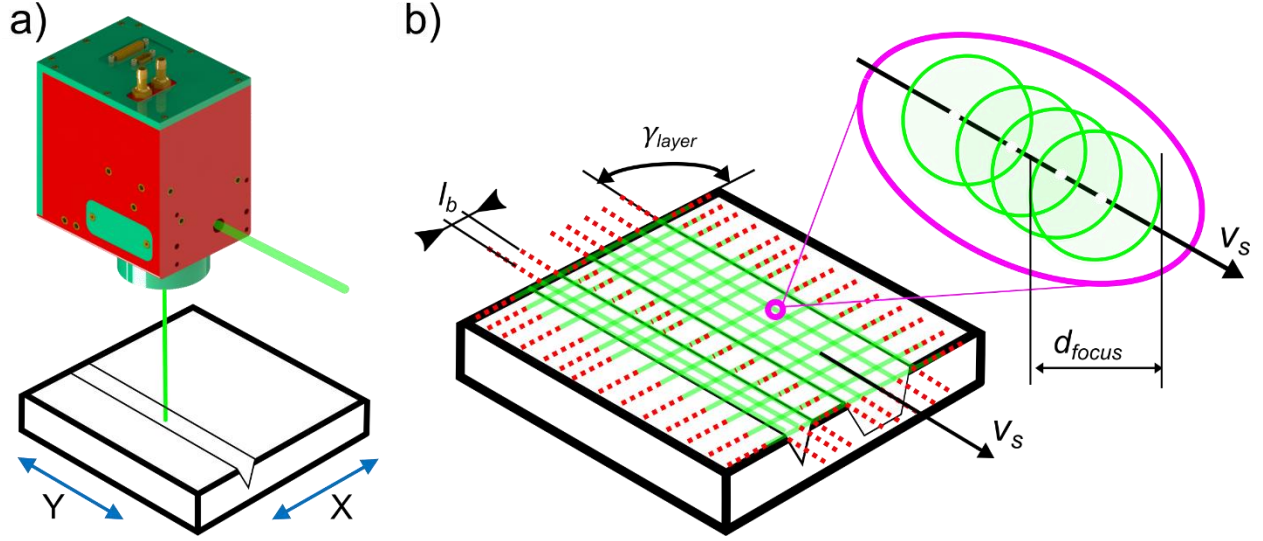

Figure S1. Illustration of the ultra-short pulse (USP) laser setup and ablation process. a) An USP laser source is guided to a Galvo-scanner head (red and green box) and focused onto the MgO crystal placed onto a xyz-stage. b) 2.5D volume ablation, i.e. layer-by-layer removal with cross-hatching. The laser beam (focal diameter  $d_{focus}$ ) scans the surface with a certain scan speed ( $v_s$ ) and a laser pulse repetition rate ( $f_{rep}$ ). Within one layer, the laser scans the surface line by line with a specified line distance ( $l_b$ ). For each subsequent layer, the sample is rotated by an angle of  $\gamma_{layer}$  yielding a cross-hatched pattern.

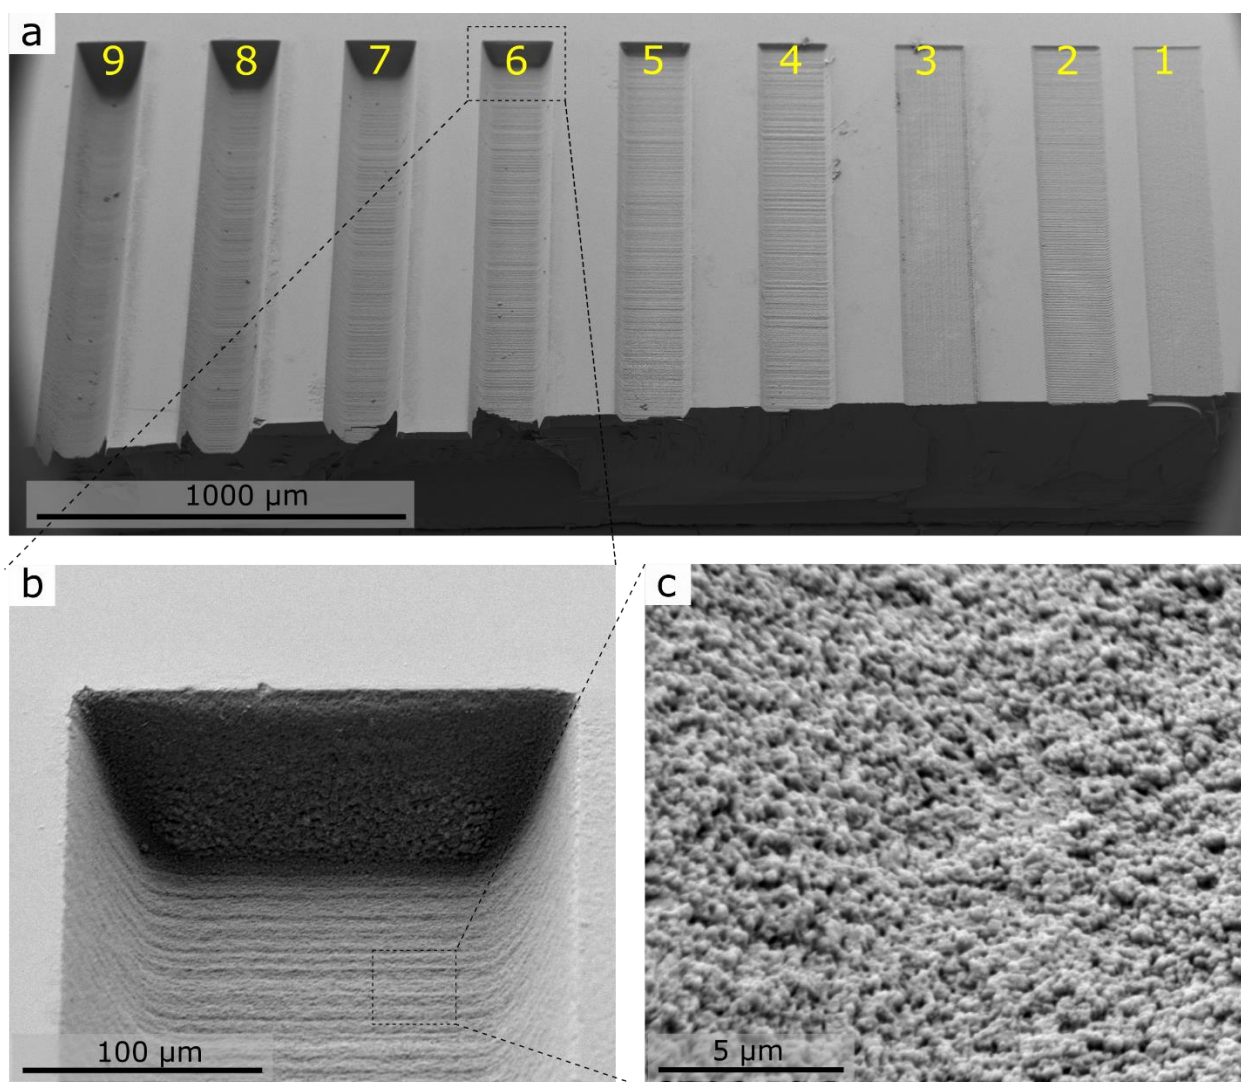

Figure S2. SEM images of the mechanically cleaved MgO\_B sample. a) Tilted view of MgO\_B showing grooves 9-1 (numbers in yellow font). b) Magnified tilted view of groove 6 in a). c) Top view of groove 6 showing the surface roughness of MgO at the bottom of the groove.

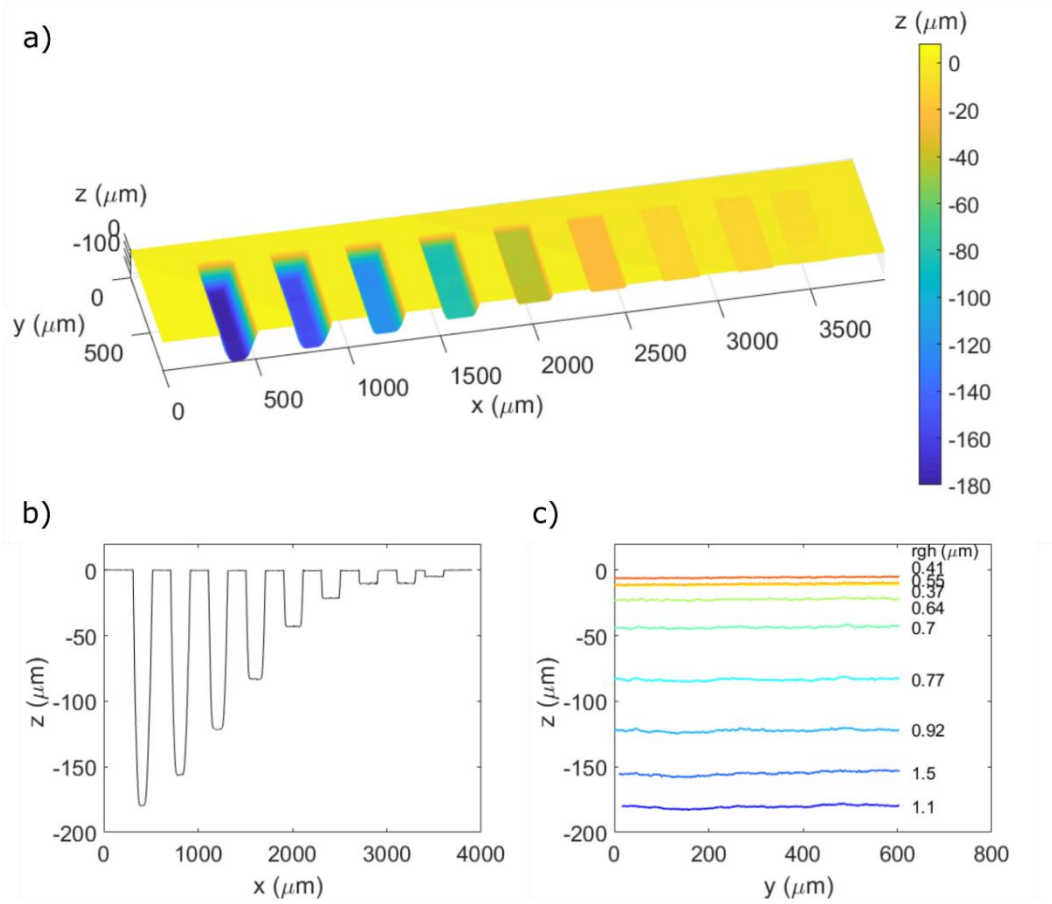

Figure S3. Optical profilometry measurements of MgO\_B. a) Tilted 3D view of MgO-B showing grooves 9-1 from left to right. b) cross-section (x-direction) showing the depths of the grooves of sample given in a). c) line-plot along the length (y-direction) of all 9 grooves with the average roughness (rgh) given in  $\mu\text{m}$ . The average roughness (rgh) is calculated as the standard deviation from the mean  $z$  position along the length of the groove measured over a 600  $\mu\text{m}$  window in the y-direction.

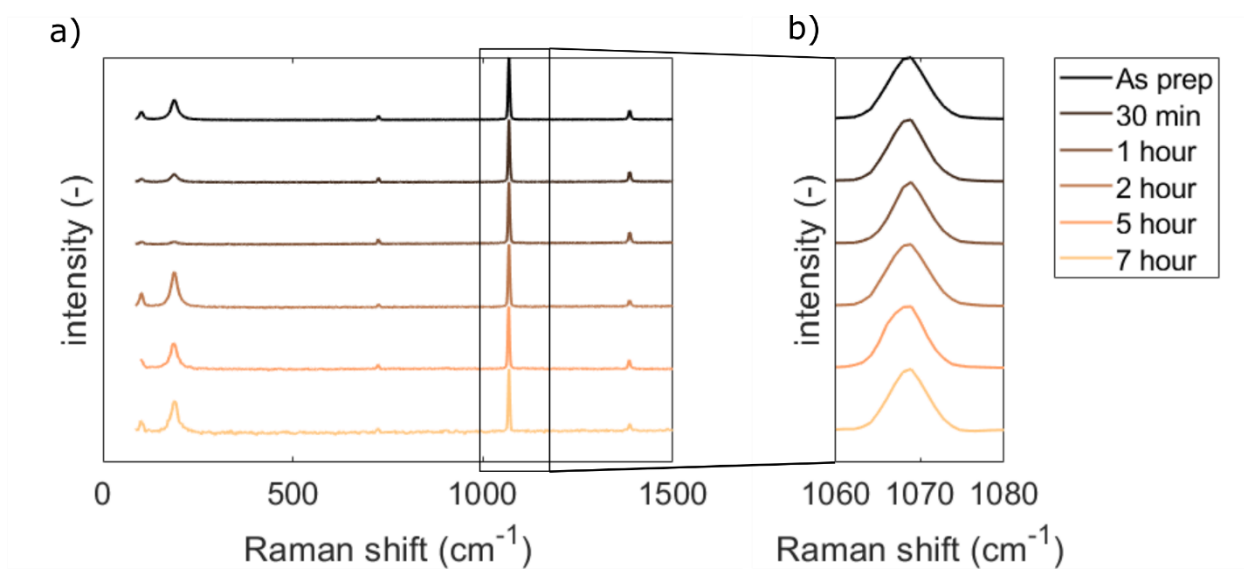

Figure S4. Ex situ time-dependent Raman spectroscopy of  $\text{NaNO}_3$  in  $\text{NaNO}_3\text{-MgO}_\text{B}$  for the as-prepared sample and after exposure to  $\text{CO}_2$  capture conditions (carbonation time ranging from 30 min to 7 hours). a) Full spectra and b) zoom of the most intense peak at 1067  $\text{cm}^{-1}$ .

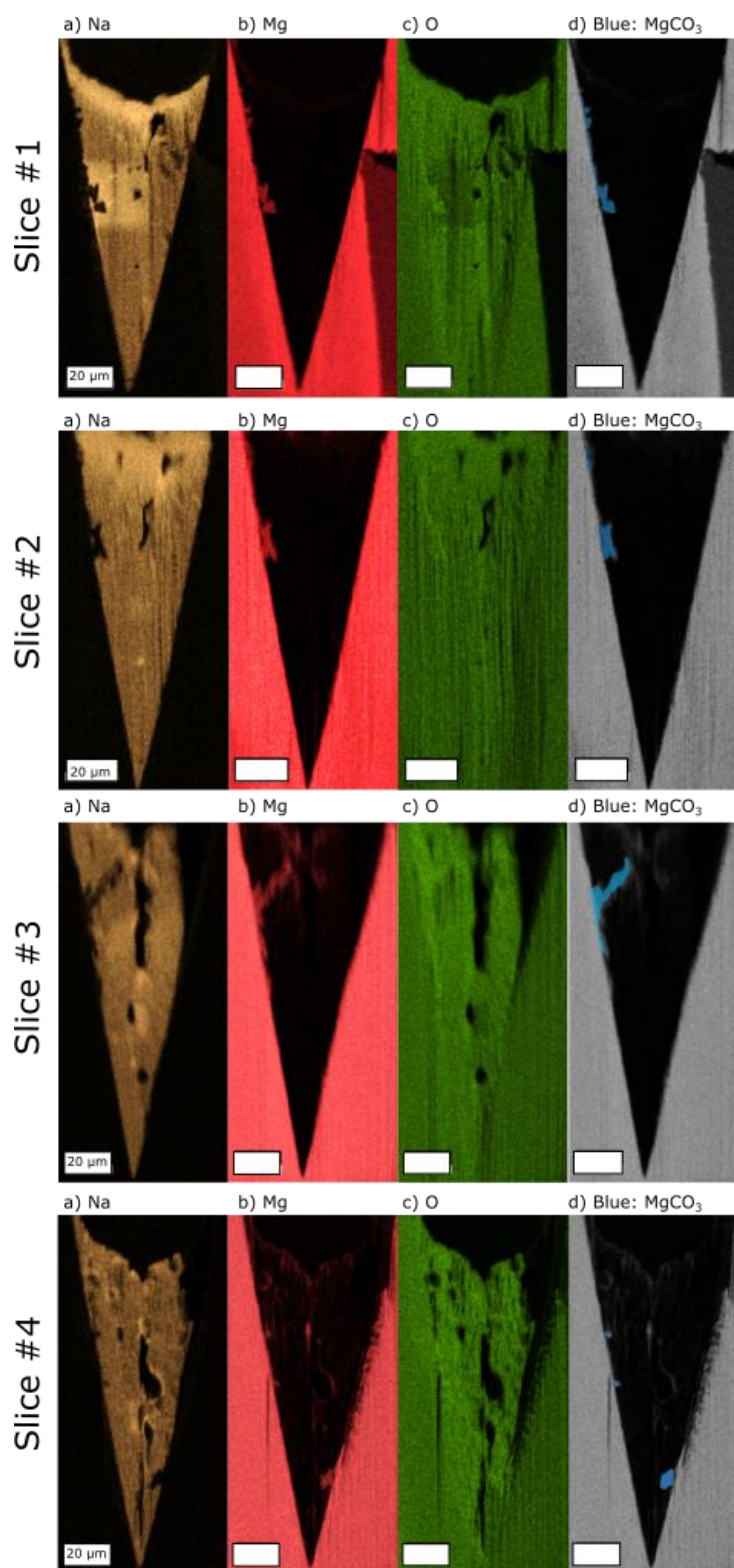

Figure S5. Plasma FIB SEM EDX at four different locations (Slice #1-4) along the length of the groove (y-direction) of NaNO<sub>3</sub>-MgO\_A5 hours-CO<sub>2</sub>. a)-c) SEM EDX elemental maps, d) SEM EDX Mg map in grey with blue overlay to highlight MgCO<sub>3</sub> particles as identified by the presence of Mg and absence of Na in EDX. Scalebar is 20 μm.

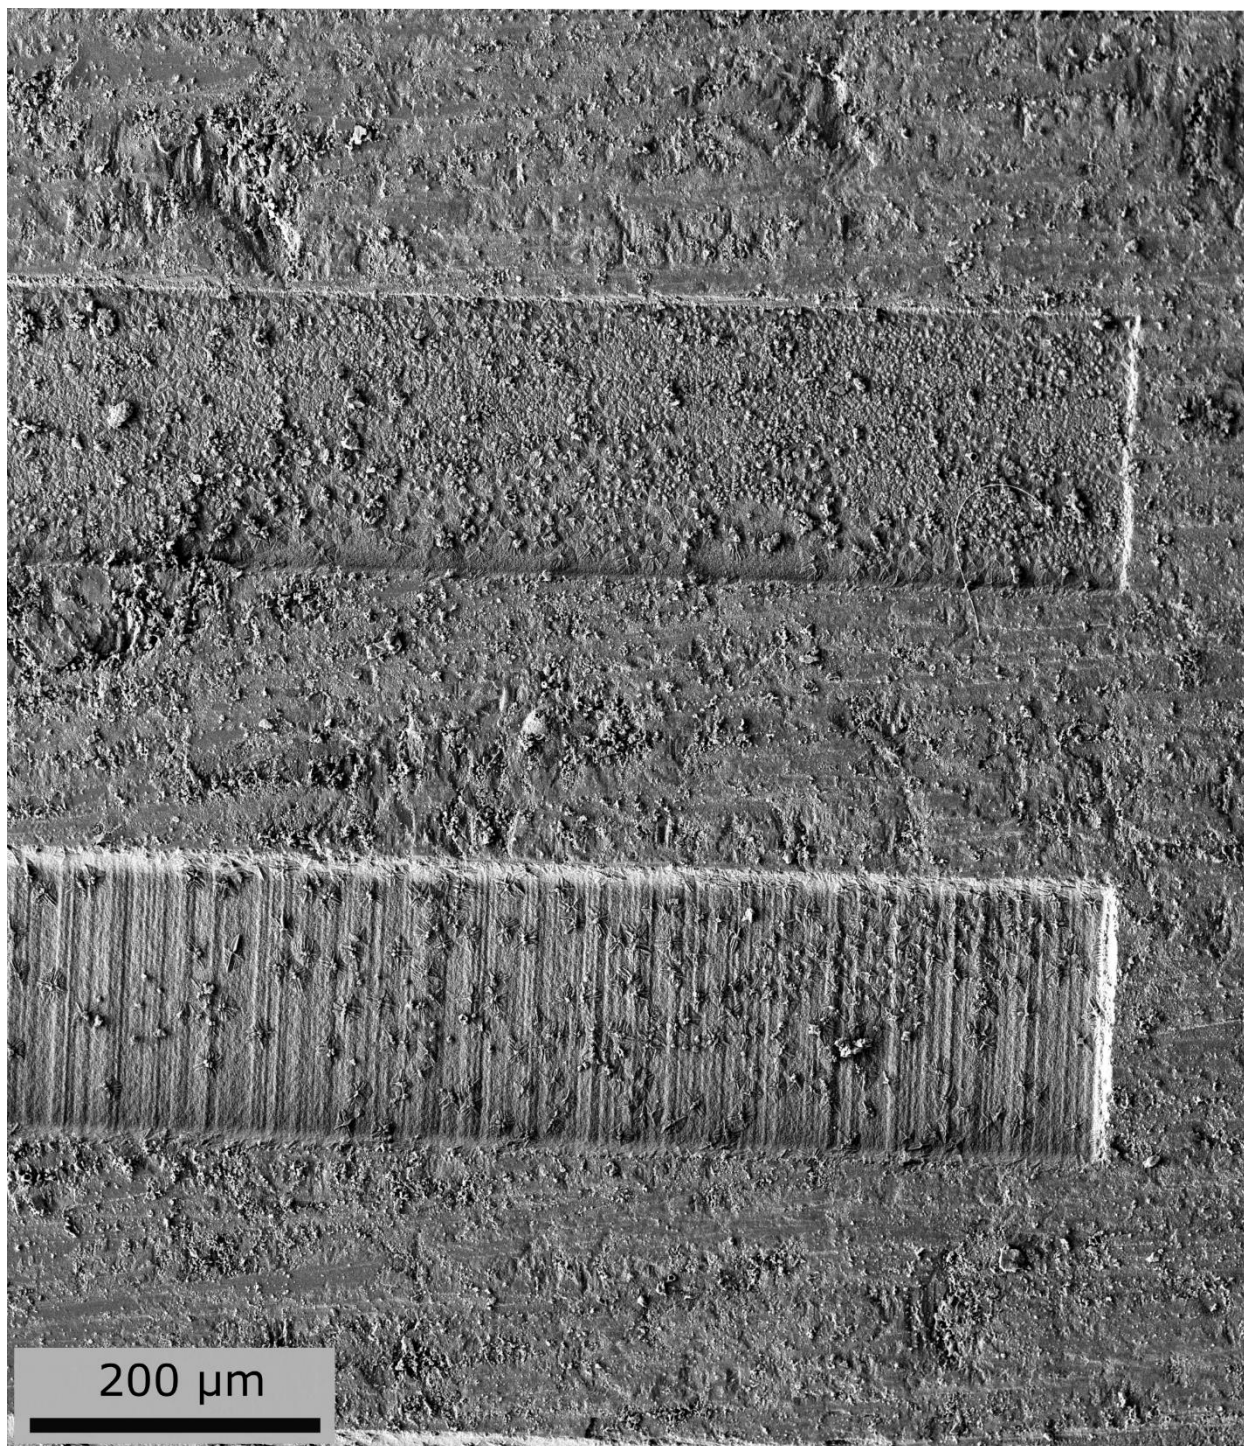

Figure S6. SEM image of grooves 3-4 (top to bottom) after 5 hours of carbonation at 330°C, i.e.  $\text{NaNO}_3$ - $\text{MgO\_B}_{5 \text{ hours-CO}_2}$ .  $\text{NaNO}_3$  has been removed by a rinse in water and the sample was coated with PtPD prior to SEM (secondary electron) imaging.

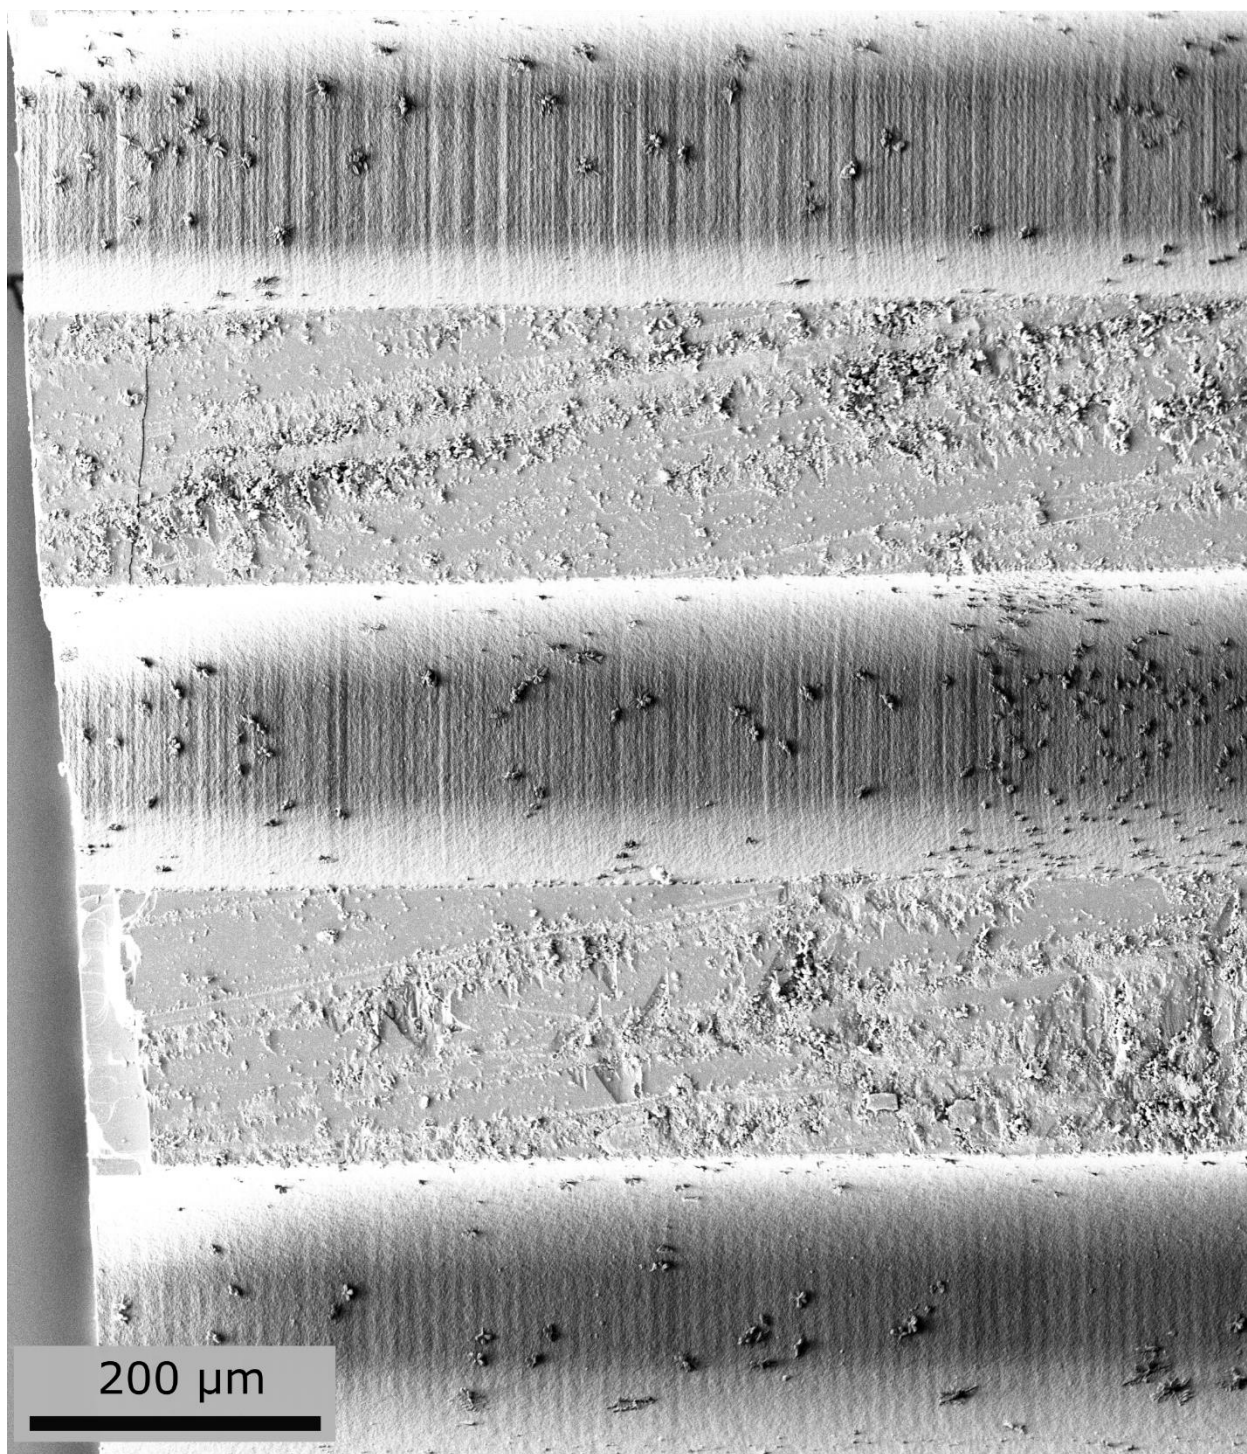

Figure S7. SEM image of grooves 7-9 (top to bottom) after 5 hours of exposure to CO<sub>2</sub> at 330°C, i.e. NaNO<sub>3</sub>-MgO\_B<sub>5 hours-CO2</sub>. MgCO<sub>3</sub> particles grow close and far away from the TPB (top of groove). NaNO<sub>3</sub> has been removed by a rinse in water and the sample was coated by PtPd prior to SEM (secondary electron) imaging.

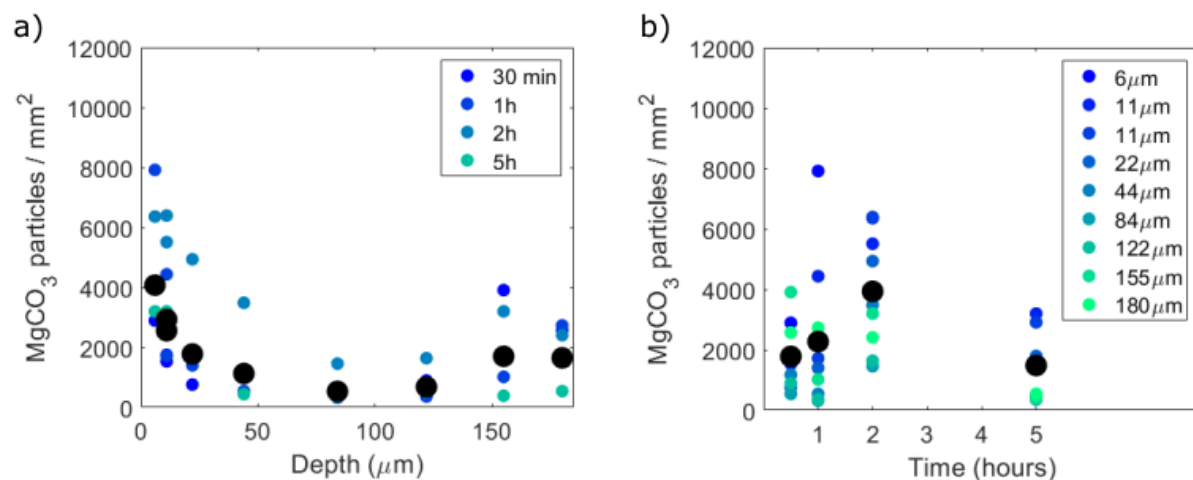

Figure S8. Number of  $\text{MgCO}_3$  of particles per unit area at the bottom of the  $\text{MgO}$  grooves in  $\text{MgO\_B}$  determined from SEM images using ImageJ. a) Number of  $\text{MgCO}_3$  particles as a function of groove depth and b) number of  $\text{MgCO}_3$  particles as function of carbonation time for the nine grooves studied (groove depth given in  $\mu\text{m}$ ). The black data points correspond to the mean number of particles per unit area for a given groove depth (a) or a given carbonation time (b).

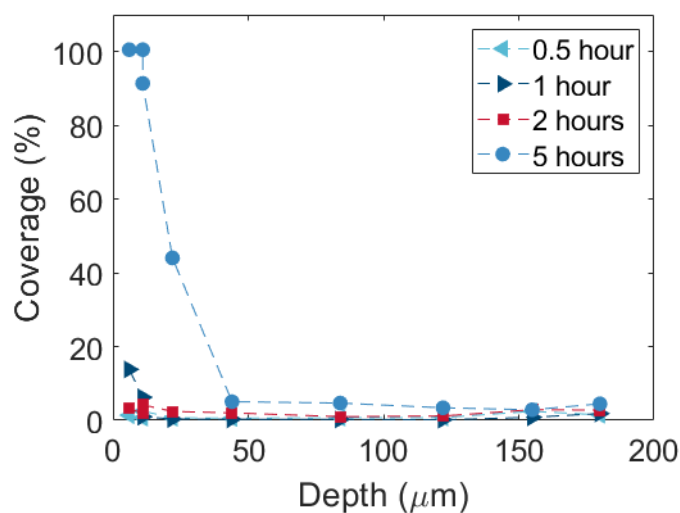

Figure S9. Coverage of the surface of  $\text{MgO}$  at the bottom of a groove as function of groove depth in  $\text{MgO\_B}$  carbonated for 0.5, 1, 2, 5 hours. Coverage is defined as the area of  $\text{MgCO}_3$  (top view) covering the surface of  $\text{MgO}$  divided by the total area of  $\text{MgO}$  at the bottom of a groove.
